# Supplementary material
Source: HighWire-hosted journal article supplement (https://bmjopen.bmj.com/content/10/12/e041198)
Supplement: inline-supplementary-material-1 [file inline-supplementary-material-1.pdf]

## Implementation and adherence of routine pertussis vaccination (DTP) in a low-resource urban birth cohort

Gunning et al.

November 13, 2020

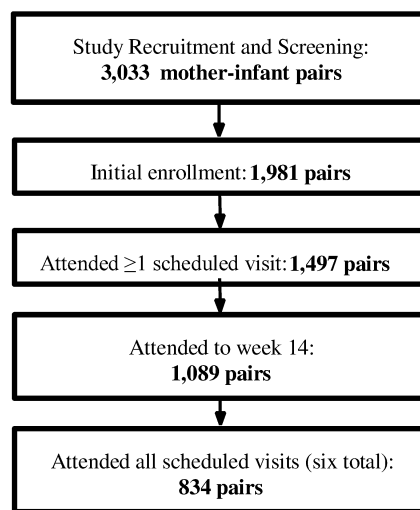

Figure S1: Study profile of birth cohort enrollment and attendance. Beyond eligibility and initial screening, the sole cause of cohort attrition was failure to attend one or more scheduled clinic visits.
