# Supplementary material
Source: HighWire-hosted journal article supplement (https://bmjopen.bmj.com/content/10/12/e041198)
Supplement: inline-supplementary-material-2 [file inline-supplementary-material-2.pdf]

## Implementation and adherence of routine pertussis vaccination (DTP) in a low-resource urban birth cohort

Gunning et al.

November 13, 2020

S1

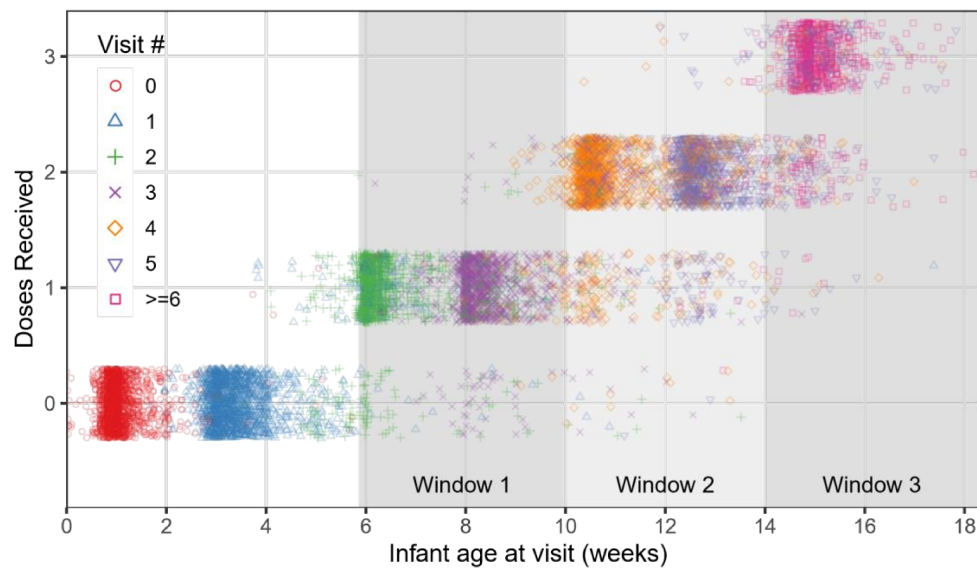

Figure S2: Infants were scheduled for 6 clinic visits over the course of the study. Figure shows the cumulative doses of DTP vaccine received per infant at each visit (color, shape) by infant age.
